# Supplementary material
Source: publisher figshare collection journal article supplement (https://acs.figshare.com/ndownloader/files/4544698)
Supplement: Supplementary file 1 [file 4544698]

Supporting Information for MS:

**A critical investigation of hydride generation-based arsenic speciation in sulfidic waters**

Britta Planer-Friedrich, Dirk Wallschläger

Number of pages: 2

Number of figures: 0

Number of tables: 2

Table S1 Coordinates and basic hydrogeochemical parameters for the six Yellowstone hot springs used for comparison of IC-ICP-MS versus HG-AFS

| Sampling site          | Latitude<br>Longitude     | Temperature<br>[°C] | Conductivity<br>[ $\mu\text{S cm}^{-1}$ ] | pH  | E <sub>H</sub><br>[mV] | O <sub>2</sub><br>[mg L <sup>-1</sup> ] | Sulfide<br>[mg L <sup>-1</sup> ] | Molar ratio<br>S/O |
|------------------------|---------------------------|---------------------|-------------------------------------------|-----|------------------------|-----------------------------------------|----------------------------------|--------------------|
| Ojo Caliente<br>source | 44°33.780'<br>110°50.333' | 92.2                | 1590                                      | 7.7 | 280                    | 0.65                                    | 1.70                             | 1.3                |
| Ojo Caliente<br>39 m   |                           | 63.3                | 1650                                      | 8.7 | 160                    | 3.34                                    | 0.09                             | 0.0                |
| Conch Spring<br>source | 44°33.389'<br>110°49.935' | 92.6                | 1565                                      | 9.6 | -190                   | 0.90                                    | 3.63                             | 2.0                |
| Conch Spring<br>11 m   |                           | 79.7                | 1600                                      | 9.6 | -120                   | 1.48                                    | 1.95                             | 0.7                |
| Conch Spring<br>30 m   |                           | 65.5                | 1660                                      | 9.5 | >-110*                 | 2.19                                    | 0.60                             | 0.1                |
| Mound<br>Geyser source | 44°33.565'<br>110°50.015' | 90.0                | 1545                                      | 9.0 | -35                    | 1.05                                    | 2.90                             | 1.4                |

\* no redox potential determined at 30 m from the source; at 15 m from the source redox potential was determined as -110 mV (with 1.8 mg L<sup>-1</sup> O<sub>2</sub>), under increasingly oxidizing conditions redox potential can be expected to be higher at 30 m

Table S2. Mean arsenic concentrations and  $\pm$  standard deviation of triplicate determinations by HG-AFS for dry-ice-frozen and HCl-stabilized samples from six Yellowstone hot springs

| Sampling site       | Dry-ice-frozen samples         |                                 |                 | HCl-preserved samples          |                                 |                 | % Recovery<br>HCl / flash-frozen samples |
|---------------------|--------------------------------|---------------------------------|-----------------|--------------------------------|---------------------------------|-----------------|------------------------------------------|
|                     | As<br>[ $\mu\text{g L}^{-1}$ ] | STD<br>[ $\mu\text{g L}^{-1}$ ] | rel. STD<br>[%] | As<br>[ $\mu\text{g L}^{-1}$ ] | STD<br>[ $\mu\text{g L}^{-1}$ ] | rel. STD<br>[%] |                                          |
| Ojo Caliente source | 1683                           | $\pm 229$                       | $\pm 14$        | 799                            | $\pm 37$                        | $\pm 5$         | 47                                       |
| Ojo Caliente 39 m   | 1724                           | $\pm 277$                       | $\pm 16$        | 1438                           | $\pm 48$                        | $\pm 3$         | 83                                       |
| Conch Spring source | 1966                           | $\pm 118$                       | $\pm 6$         | 343                            | $\pm 12$                        | $\pm 4$         | 17                                       |
| Conch Spring 11 m   | 2062                           | $\pm 177$                       | $\pm 9$         | 1422                           | $\pm 49$                        | $\pm 3$         | 69                                       |
| Conch Spring 30 m   | 2108                           | $\pm 172$                       | $\pm 8$         | 1783                           | $\pm 25$                        | $\pm 1$         | 85                                       |
| Mound Geyser source | 1695                           | $\pm 109$                       | $\pm 6$         | 704                            | $\pm 13$                        | $\pm 2$         | 42                                       |
| Mean                |                                |                                 | $\pm 10$        |                                |                                 | $\pm 3$         |                                          |
